# Supplementary material
Source: PubMed Central journal article supplement (PMC6637045)
Supplement: BPH-176-2945-s001.pdf [file BPH-176-2945-s001.pdf]

**Agonist at PPAR $\delta$  mitigates endothelial dysfunction via induction of dihydrofolate reductase gene and activation of BH<sub>4</sub> salvage pathway**

**Running title:** PPAR $\delta$  agonist increases BH<sub>4</sub> Salvage

Zihui Zhang<sup>1</sup>, Xinya Xie<sup>1</sup>, Qinyu Yao<sup>1</sup>, Jia Liu<sup>1</sup>, Ying Tian<sup>1</sup>, Chunmiao Yang<sup>1</sup>, Lei Xiao<sup>1\*</sup> and Nanping Wang<sup>2\*</sup>

<sup>1</sup>Cardiovascular Research Center, School of Basic Medical Sciences, Xi'an Jiaotong University, Xi'an, 710061, China; <sup>2</sup>The Advanced Institute for Medical Sciences, Dalian Medical University, Dalian, 116044, China

**\*Correspondence**

Nanping Wang, MD. Ph.D.

The Advanced Institute for Medical Sciences,

Dalian Medical University, Dalian, 116044, China,

Tel: +86041186110233, Fax: +86041186118981. E-mail: npwang@bjmu.edu.cn; or

Lei Xiao, Ph.D.

Cardiovascular Research Center,

Xi'an Jiaotong University, Xi'an, 710061, China,

Tel: +8602982655186, Fax: +8602982655196. E-mail: xiaolei0122@xjtu.edu.cn

**Table S1 Sequences of primers for qPCR**

| <b>Gene</b>   | <b>Sequences</b>                                                          |
|---------------|---------------------------------------------------------------------------|
| Human DHFR    | Forward: TCGCTAAACTGCATCGTCGCTGTGTC<br>Reverse: TGGAGGTTCTTGAGTTCTCTGCTGA |
| Human ANGPTL4 | Forward: AAAGAGGCTGCCCGAGAT<br>Reverse: GCGCCTCTGAATTACTGTCC              |
| Human PDK4    | Forward: ACGGCTTGCCAATTTCTCGT<br>Reverse: GCCACTTCTTTTGCCAGGTT            |
| Human GAPDH   | Forward: ACCACAGTCCATGCCATCAC<br>Reverse: TCCACCACCCTGTTGCTGTA            |

---

**Table S2 Primers for amplifying the promoter segments**

| <b>Name</b>         | <b>Sequences</b>                  |
|---------------------|-----------------------------------|
| Forward             |                                   |
| pGL3/hDHFR-453-Luc  | AGCTGCTAGCTGAGCCATGCTGTTGCAGTCTT  |
| pGL3/hDHFR-1253-Luc | AGCTGCTAGCCCTCAGCAACTCAAGCCGTGTT  |
| pGL3/hDHFR-1911-Luc | AGCTGCTAGCGGTCTATCACTGCCTACCTTCCA |
| Reverse             | AGCTAAGCTTCCGCCGCACATAGTAGGTTCTG  |

---

**Table S3 Primers for CHIP assay**

| <b>Name</b> | <b>Sequences</b>                                                   |
|-------------|--------------------------------------------------------------------|
| PPRE1       | Forward: GGAGTCAGGAGACCTGAGTTCC<br>Reverse: CGATGATAGGGCTGGAGGAGGA |
| PPRE2, 3    | Forward: TGA CTGCTTTTAACCGTAGTGA<br>Reverse: CAAGGGGTGCGTCTTTTAAC  |
| PPRE4       | Forward: GCTTTTCCTGTGGCAGTATCTCT<br>Reverse: GTCATATTGTGCAGTTCCCCA |
| PPRE5       | Forward: ATGCCCTTCCACAGCCTCAATC<br>Reverse: GAGTCCTTCCTGTTGCCATCCT |
| PPRE6       | Forward: CCTTTAAATGGTGGGTGCAAA<br>Reverse: AGGGCATTGAAGACTGGTGT    |
| PPRE7       | Forward: GCTGCTACCGGTCTTGATTC<br>Reverse: ACAGGAAACACTTAAATTGCAGT  |
| PPRE8       | Forward: GCTCTACCATCCCCTTAACCT<br>Reverse: TCTCCTCAGTCATGGCTCTG    |
| PPRE9       | Forward: AGGGAGGGATTATGGGGTCT<br>Reverse: GGTTAAGGGGATGGTAGAGCT    |

---
